# Supplementary material
Source: PubMed Central journal article supplement (PMC3123977)
Supplement: mmc1.pdf [file mmc1.pdf]

**Supporting Material**

---

**Mitochondrial energetics, pH regulation, and ion  
dynamics:  
A combined computational-experimental approach**

---

**An-Chi Wei<sup>1</sup>, Miguel A. Aon<sup>2</sup>, Brian O'Rourke<sup>2</sup>, Raimond L. Winslow<sup>1</sup>, Sonia  
Cortassa<sup>1,2</sup>**

<sup>1</sup>Institute of Computational Medicine, Department of Biomedical Engineering, and

<sup>2</sup>Division of Cardiology, School of Medicine, Johns Hopkins University, Baltimore,  
MD

## Mitochondrial Model of Energy Metabolism and ion dynamics

The mitochondrial model developed in the present manuscript is based on the model published by Cortassa et al.(1, 2).The mitochondrial models accounts for the basic mitochondrial electrophysiology and energetics, including the TCA cycle, oxidative phosphorylation and ion transport across inner mitochondrial membrane. Succinate dehydrogenase (SDH) is now modeled as part of the respiratory chain in the mitochondria membrane. Two transporters, the mitochondrial Na<sup>+</sup>/H<sup>+</sup> exchanger (NHE), and the mitochondrial phosphate carrier (PiC), were added to the original mitochondrial model. The mitochondrial concentrations of protons, sodium ions, and phosphate ions were added as new state variables. In the model formulation, the pH in the mitochondria matrix is not a constant, thus it is necessary to consider the pH effects on the ionic metabolite forms as well as its effects on the equilibrium constants. The new model formulation accounts for multiple equilibria for protons and magnesium with ATP, ADP, and phosphate. Also, apparent equilibrium constants of F<sub>0</sub>F<sub>1</sub>-ATPase, SDH, and succinate lyase(SL) are a function of pH. Besides the new components, we have adjusted the parameters in both TCA cycle and respiratory chain so that TCA cycle intermediate levels reproduced the literature data, and the temporal profile of mitochondrial NADH and membrane potential reproduce our experiments(Fig. 4 in the manuscript).The detailed mathematical expressions and parameters of the model are listed in the following sections.

### Section 1.Computational modeling of Na<sup>+</sup>/H<sup>+</sup> exchanger (NHE) and phosphate carrier (PiC)

Models of the Na<sup>+</sup>/H<sup>+</sup> exchanger (NHE) and phosphate carrier (PiC) were developed and incorporated in the previous mitochondrial model. NHE, the main pathway of Na<sup>+</sup> efflux from mitochondria, was modeled using a two-state kinetic mechanism developed previously by Crampin and Smith(3).Model parameters were adjusted to ensure the reversibility of ion transport, as well as to match transport rates determined experimentally (4) (Fig. S1).

The steady state current through the NHE is described by the following equation:

$$J_{NHE} = c_{NHE} \frac{\beta_1^+ \beta_2^+ - \beta_1^- \beta_2^-}{\beta_1^+ + \beta_1^- + \beta_2^+ + \beta_2^-} \frac{1}{1 + 10^{n_i(pH_i - pK_i)}} \quad (\text{Eq.S1})$$

where

$$\beta_1^+ = \frac{k_1^+ K_{H\_NHE} [Na^+]_m}{K_{H\_NHE} [Na^+]_m + K_{H\_NHE} K_{Na\_NHE} + K_{Na\_NHE} [H^+]_m}$$

$$\beta_2^+ = \frac{k_4^+ K_{Na\_NHE} [H^+]_i}{K_{H\_NHE} [Na^+]_i + K_{H\_NHE} K_{Na\_NHE} + K_{Na\_NHE} [H^+]_i}$$

$$\beta_1^- = \frac{k_1^- K_{H\_NHE} [Na^+]_i}{K_{H\_NHE} [Na^+]_i + K_{H\_NHE} K_{Na\_NHE} + K_{Na\_NHE} [H^+]_i}$$

$$\beta_2^- = \frac{k_4^- K_{Na\_NHE} [H^+]_m}{K_{H\_NHE} [Na^+]_m + K_{H\_NHE} K_{Na\_NHE} + K_{Na\_NHE} [H^+]_m}$$

being  $k_i^+$  and  $k_i^-$ , pseudofirst order rate constants for the transition between different states with second order units (they are considered pseudo first order because only one of the two factors in the product in the rate expressions correspond to a state variable, e.g.  $H^+$  or  $Na^+$ );  $K_{H\_NHE}$  and  $K_{Na\_NHE}$  are the dissociation constants of  $H^+$  and  $Na^+$ .

The phosphate carrier mediates the electroneutral exchange of Pi and hydroxyl anion ( $OH^-$ ) between mitochondrial and cytoplasmic compartments. Previous studies reported that two binding sites exist and form a ternary complex with Pi and  $OH^-$ , binding in a random order to either the mitochondrial or cytoplasmic side of PiC(5). Thus, PiC was modeled according to an equilibrium random Bi:Bi reaction kinetic scheme(6)whose steady state current is described by:

$$J_{PiC} = c_{PiC} \left( \frac{V_{PiC,f} \frac{[H_2PO_4^{2-}]_i [OH^-]_m}{K_{Pi,i} K_{OH,m}} - V_{PiC,b} \frac{[H_2PO_4^{2-}]_m [OH^-]_i}{K_{Pi,m} K_{OH,i}}}{1 + \frac{[H_2PO_4^{2-}]_i}{K_{Pi,i}} + \frac{[OH^-]_m}{K_{OH,m}} + \frac{[H_2PO_4^{2-}]_m}{K_{Pi,m}} + \frac{[OH^-]_i}{K_{OH,i}} + \frac{[H_2PO_4^{2-}]_m [OH^-]_i}{K_{Pi,m} K_{OH,i}} + \frac{[H_2PO_4^{2-}]_i [OH^-]_m}{K_{Pi,i} K_{OH,m}}} \right) \quad (\text{Eq. S2})$$

where  $V_{PiC,f}$  and  $V_{PiC,b}$  are the maximal forward and backward transport rates of PiC, respectively;  $K_{Pi,i}$  and  $K_{Pi,m}$  are the cytosolic and mitochondrial Pi dissociation constants, and  $K_{OH,i}$  and  $K_{OH,m}$  are the cytosolic and mitochondrial  $OH^-$  dissociation constants. The dissociation constants for Pi and  $OH^-$  were assumed to be the same at the inner and outer sites of the mitochondrial inner membrane. Figure S2 shows the Lineweaver-Burk representation of the PiC kinetics, and its simulation with Eq. S2. Model parameters for PiC are listed in Table S1.

**Table S1. Parameter values for the mitochondrial sodium proton exchanger and phosphate carrier**

| Symbol               | Value                                | Units                                           | Description                               | Eq. | References   |
|----------------------|--------------------------------------|-------------------------------------------------|-------------------------------------------|-----|--------------|
| $k_1^+$              | 0.0252                               | $\text{ms}^{-1}$                                | NHE forward rate constant                 | 1   | adjusted     |
| $k_1^-$              | 0.0429                               | $\text{ms}^{-1}$                                | NHE backward rate constant                | 1   | adjusted     |
| $k_4^+$              | 0.16                                 | $\text{ms}^{-1}$                                | NHE forward rate constant                 | 1   | adjusted     |
| $k_4^-$              | 0.0939                               | $\text{ms}^{-1}$                                | NHE backward rate constant                | 1   | Constrained* |
| $K_{\text{Na\_NHE}}$ | 24                                   | mM                                              | Na+Dissociation constant                  | 1   | (4)          |
| $\text{pK}_\text{H}$ | 6.8                                  |                                                 | pKa value of dissociation constant for H+ | 1   | (7)          |
| $\text{pK}_\text{i}$ | 8.52                                 |                                                 | Proton inhibitory constant                | 1   | (7)          |
| $n_\text{i\_NHE}$    | 3                                    |                                                 | Hill coefficient for H+ binding           | 1   | (8)          |
| $C_{\text{NHE}}$     | 0.28 (NHE) or 0.00785 (mitochondria) | mM                                              | NHE concentration                         | 1   | adjusted     |
| $K_{\text{Pi,e}}$    | 11.06                                | mM                                              | Extramitochondrial Pi binding constant    | 2   | (5)          |
| $K_{\text{Pi,m}}$    | 11.06                                | mM                                              | Mitochondrial Pi binding constant         | 2   | (5)          |
| $K_{\text{OH,e}}$    | 40.8                                 | nM                                              | Extramitochondrial OH- binding constant   | 2   | (5)          |
| $K_{\text{OH,m}}$    | 40.8                                 | nM                                              | Mitochondrial OH- binding constant        | 2   | (5)          |
| $V_{\text{PiC,f}}$   | 90                                   | $\mu\text{mol min}^{-1} \text{mg protein}^{-1}$ | Forward $V_{\text{max}}$                  | 2   | adjusted     |
| $V_{\text{PiC,b}}$   | 90                                   | $\mu\text{mol min}^{-1} \text{mg protein}^{-1}$ | Backward $V_{\text{max}}$                 | 2   | adjusted     |
| $C_{\text{PiC}}$     | 1(PiC) or 1.6915 (mitochondria)      | $\text{mg protein ml}^{-1}$                     | PiC concentration                         | 2   | adjusted     |

\* by microscopic reversibility

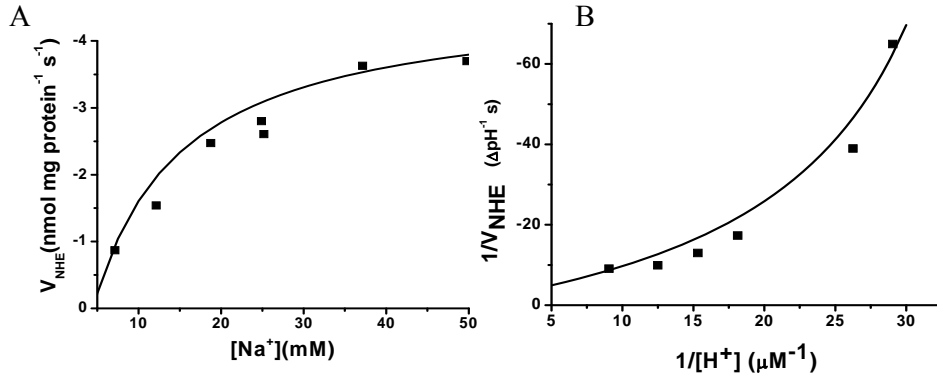

**Figure S1. Model and experimental data illustrating the (A)  $Na_i$  and (B)  $pH_m$  dependence of the  $Na^+/H^+$  exchanger (NHE) flux**

The adjusted kinetic parameters for the NHE module were:  $K_{Na\_NHE} = 24\text{mM}$  and  $pK_m = 6.8$ ,  $pK_i = 8.52$ ;  $k_1^+ = 0.0252\text{ ms}^{-1}$ ,  $k_1^- = 0.0429\text{ms}^{-1}$ ,  $k_4^+ = 0.160\text{ms}^{-1}$ ,

$k_4^- = k_1^+ k_4^+ / k_1^-$ ,  $n=3$ , NHE concentration = 0.03. Data points correspond to experimental measurements (4) whereas the solid line corresponds to steady-state NHE flux obtained from the rate expression in Eq. S1. Panel A: Initial rates of H<sup>+</sup> efflux from rat heart mitochondria while external Na<sup>+</sup> concentration was varied (4). Simulation conditions were set to  $[H^+]_i = 1.0 \cdot 10^{-7}\text{M}$ ,  $[H^+]_m = 1.12 \cdot 10^{-7}\text{M}$ ,  $[Na^+]_m = 5\text{mM}$ ,  $[Na^+]_i = 5\text{--}50\text{mM}$ , NHE\_conc = 0.28mM. Panel B: Initial rates of H<sup>+</sup> efflux as a function of mitochondrial pH,  $pH_m$ , in the presence of antimycin A. After  $pH_m$  reached a steady state, 50mM  $Na_i$  was rapidly injected (4). Simulation conditions were set to  $[H^+]_i = 1.0 \cdot 10^{-7}\text{M}$ ,  $[H^+]_m = 1.12 \cdot 10^{-7}\text{M}$ ,  $[Na^+]_m = 5\text{mM}$ ,  $[Na^+]_i = 5\text{--}50\text{mM}$ . The units conversion used the proton buffering power of mitochondria reported in (4) (40nmol H<sup>+</sup>/pH unit), and the mitochondrial NHE protein concentration was adjusted to reproduce the experimental data.

A

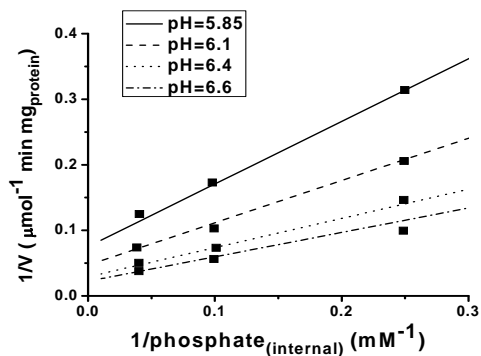

B

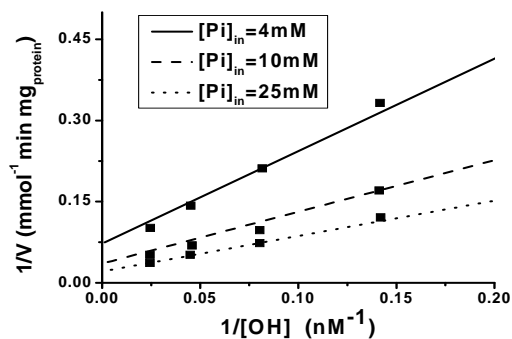

### Figure S2. Model and experimental data of PiC fluxes

The plots correspond to Lineweaver-Burk representations of experimental and computational data. Individual data points indicate experimental data whereas continuous lines correspond to the plot of the phosphate carrier rate expression (Eq. S2). (A) Initial rates of internal phosphate efflux are plotted as function of the internal phosphate concentrations from reconstituted mitochondrial membranes (5), at pH values 5.85, 6.1, 6.4, and 6.6 in the presence of valinomycin and nigericin; (B) Initial rates of internal phosphate efflux at pH conditions, corresponding to  $\text{OH}^-$  ion concentrations of 7.1, 12.6 and 39.8 nM.

## Section 2.TCA cycle

The optimization criterion for the TCA cycle kinetic parameters was provided by the intermediary concentrations reported by Randle and Tubbs (9)(Table S2). Those concentrations were simulated by the model under respiratory state 3 conditions at the steady state.

Table S2. **Adjustment of model parameters for the TCA cycle**

| <b>TCA cycle intermediate</b> | <b>Experimental data*</b> | <b>Model<sup>†</sup></b> |
|-------------------------------|---------------------------|--------------------------|
| <b>Citrate</b>                | <b>0.23</b>               | <b>0.239</b>             |
| <b>Isocitrate</b>             | <b>0.03</b>               | <b>0.054</b>             |
| <b>2-Oxoglutarate</b>         | <b>0.131</b>              | <b>0.149</b>             |
| <b>SuccinylCoA</b>            | <b>0.0658</b>             | <b>0.0308</b>            |
| <b>Succinate</b>              | <b>0.329</b>              | <b>0.341</b>             |
| <b>Fumarate</b>               | <b>0.329</b>              | <b>0.248</b>             |
| <b>Malate</b>                 | <b>0.164</b>              | <b>0.219</b>             |
| <b>Oxaloacetate</b>           | <b>0.023</b>              | <b>0.0177</b>            |
| <b>Sum<sup>‡</sup></b>        | <b>1.303</b>              | <b>1.3</b>               |
| <b>AcCoA<sup>‡</sup></b>      | <b>0.003-0.009</b>        | <b>0.001-0.01</b>        |
| <b>NADH+NAD<sup>‡</sup></b>   | <b>0.86</b>               | <b>1</b>                 |

\* converted from(9)tomM units.

<sup>†</sup> simulated under respiratory state 3 conditions after 500 seconds.

<sup>‡</sup> Model parameter adjusted according to experimental data.

### Section 3. Ordinary differential equations of the mitochondrial model

**TABLE S3. System of differential and algebraic equations used in the mitochondrial model**

|                                                                                                                                   |       |
|-----------------------------------------------------------------------------------------------------------------------------------|-------|
| $\frac{d\Delta\Psi_m}{dt} = \frac{V_{He} + V_{He(SDH)} - V_{Hu} - V_{ANT} - V_{Hleak} - V_{NaCa} - 2V_{uni}}{C_{mito}}$           | (S3)  |
| $\frac{d[ADP]_m}{dt} = V_{ANT} - V_{ATPase} - V_{SL}$                                                                             | (S4)  |
| $[ATP]_m = C_A - [ADP]_m$                                                                                                         | (S5)  |
| $\frac{d[NADH]}{dt} = -V_{O_2} + V_{IDH} + V_{KGDH} + V_{MDH}$                                                                    | (S6)  |
| $\frac{d[ISOC]}{dt} = V_{ACO} - V_{IDH}$                                                                                          | (S7)  |
| $\frac{d[\alpha KG]}{dt} = V_{IDH} - V_{KGDH} + V_{AAT}$                                                                          | (S8)  |
| $\frac{d[SCoA]}{dt} = V_{KGDH} - V_{SL}$                                                                                          | (S9)  |
| $\frac{d[Suc]}{dt} = V_{SL} - V_{O_2SDH}$                                                                                         | (S10) |
| $\frac{d[FUM]}{dt} = V_{O_2SDH} - V_{FH}$                                                                                         | (S11) |
| $\frac{d[MAL]}{dt} = V_{FH} - V_{MDH}$                                                                                            | (S12) |
| $\frac{d[OAA]}{dt} = V_{MDH} - V_{CS} - V_{AAT}$                                                                                  | (S13) |
| $[CIT] = C_{Kint} - \left( [ISOC] + [\alpha KG] + [SCoA] + [Suc] + \dots \right. \\ \left. \dots + [FUM] + [MAL] + [OAA] \right)$ | (S14) |
| $\frac{d[Ca^{2+}]_m}{dt} = \delta_{Ca} (V_{uni} - V_{NaCa})$                                                                      | (S15) |
| $\frac{d[Na^+]_m}{dt} = V_{NHE} - 3V_{NaCa}$                                                                                      | (S16) |
| $\frac{d[Pi]_m}{dt} = -V_{ATPase} + V_{PiC} - V_{SL}$                                                                             | (S17) |
| $\frac{d[H^+]_m}{dt} = \delta_H \left( -\sum_i \bar{N}_H^i \frac{d[L_i]}{dt} - \sum_{k=1}^{N_r} n_k J_k + J_H \right)$            | (S18) |



#### Section 4. Rate equations

In the following sections we recapitulate all equations of the updated mitochondrial energetics model, irrespective of them being new to this upgrade or identical to the previous version of the model.

#### TCA cycle rate equations

$$V_{CS} = \frac{k_{cat}^{CS} E_T^{CS}}{\left(1 + \frac{K_{M}^{AcCoA}}{[AcCoA]}\right) \left(1 + \frac{K_{M}^{OAA}}{[OAA]}\right)}$$

$$V_{ACO} = k_f^{ACO} \left( [CIT] - \frac{[ISOC]}{K_E^{ACO}} \right)$$

$$V_{IDH} = k_{cat}^{IDH} E_T^{IDH} \left[ \left( 1 + \frac{[H^+]_m}{k_{h,1}} + \frac{k_{h,2}}{[H^+]_m} \right) + f_i^{IDH} \left( \frac{K_M^{NAD}}{[NAD]} \right) + \dots \right]^{-1}$$

$$\left[ f_a^{IDH} \left( \frac{K_M^{ISOC}}{[ISOC]} \right)^{ni} + f_a^{IDH} f_i^{IDH} \left( \frac{K_M^{ISOC}}{[ISOC]} \right)^{ni} \left( \frac{K_M^{NAD}}{[NAD]} \right) \right]$$

$$f_a^{IDH} = \left[ \left( 1 + \frac{[ADP^{3-}]_m}{K_{ADP}^a} \right) \left( 1 + \frac{[Ca^{2+}]_m}{K_{Ca}^a} \right) \right]^{-1}$$

$$f_i^{IDH} = \left( 1 + \frac{[NADH]}{K_{i,NADH}} \right)$$

$$V_{KGDH} = \frac{k_{cat}^{KGDH} k_T^{KGDH}}{1 + \frac{[H^+]_m}{k_{h,1a}} + \frac{k_{h,2a}}{[H^+]_m} + f_a^{KGDH} \left( \frac{k_M^{\alpha KG}}{[\alpha KG]} \right)^{n_{\alpha KG}} + f_a^{KGDH} \frac{k_M^{NAD}}{[NAD]}}$$

$$f_a^{KGDH} = \left[ \left( 1 + \frac{[Mg^{2+}]}{K_D^{Mg^{2+}}} \right) \left( 1 + \frac{[Ca^{2+}]_m}{K_D^{Ca^{2+}}} \right) \right]^{-1}$$

$$V_{SL} = k_f^{SL} \left( [SCoA][ADP]_m [Pi]_m - \frac{[Suc][ATP]_m [CoA]}{K_{E,app}^{SL}} \right)$$

$$K_{E,app}^{SL} = K_{Eq}^{SL} \frac{P_{SUC} P_{ATP}}{P_{Pi} P_{ADP}}$$

Succinate dehydrogenase is included in the respiratory complexes table

$$V_{FH} = k_f^{FH} \left( [FUM] - \frac{[MAL]}{K_E^{FH}} \right)$$

$$V_{MDH} = \frac{k_{cat}^{MDH} E_T^{MDH} f_{h,a} f_{h,i}}{1 + \frac{K_M^{MAL}}{[MAL]} \left(1 + \frac{[OAA]}{K_i^{OAA}}\right) + \frac{K_M^{NAD}}{[NAD]} + \frac{K_M^{MAL}}{[MAL]} \left(1 + \frac{[OAA]}{K_i^{OAA}}\right) \frac{K_M^{NAD}}{[NAD]}}$$

$$f_{h,a} = \left(1 + \frac{[H^+]}{k_{h1}} + \frac{[H^+]^2}{k_{h1}k_{h2}}\right)^{-1} + k_{offset}$$

$$f_{h,i} = \left(1 + \frac{k_{h3}}{[H^+]} + \frac{k_{h3}k_{h4}}{[H^+]^2}\right)$$

$$V_{AAT} = k_f^{AAT} [OAA][GLU] \frac{k_{ASP} K_E^{AAT}}{\left(k_{ASP} K_E^{AAT} + [\alpha KG] k_f^{AAT}\right)}$$

$$V_{AAT} = K_f^{AAT} \left( [OAA][GLU] - \frac{[\alpha KG][ASP]}{K_E^{AAT}} \right)$$

### Oxidative Phosphorylation rate equations

$$V_{O_2} = 0.5 \rho^{res} \frac{\left( r_a + r_{c1} e^{\left(\frac{6F\Delta\Psi_B}{RT}\right)} \right) e^{\left(\frac{FA_{res}}{RT}\right)} - r_a e^{\left(\frac{g6F\Delta\mu_H}{RT}\right)} + r_{c2} e^{\left(\frac{FA_{res}}{RT}\right)} e^{\left(\frac{g6F\Delta\mu_H}{RT}\right)}}{\left(1 + r_1 e^{\left(\frac{FA_{res}}{RT}\right)}\right) e^{\left(\frac{6F\Delta\Psi_B}{RT}\right)} + \left(r_2 + r_3 e^{\left(\frac{FA_{res}}{RT}\right)}\right) e^{\left(\frac{g6F\Delta\mu_H}{RT}\right)}}$$

$$V_{He} = 6 \rho^{res} \frac{\left( r_a e^{\left(\frac{A_{res}F}{RT}\right)} - (r_a + r_b) e^{\left(\frac{g6F\Delta\mu_H}{RT}\right)} \right)}{\left(1 + r_1 e^{\left(\frac{FA_{res}}{RT}\right)}\right) e^{\left(\frac{6F\Delta\Psi_B}{RT}\right)} + \left(r_2 + r_3 e^{\left(\frac{FA_{res}}{RT}\right)}\right) e^{\left(\frac{g6F\Delta\mu_H}{RT}\right)}}$$

$$A_{res} = \frac{RT}{F} \ln \left( K_{res} \sqrt{\frac{[NADH]}{[NAD^+]}} \right)$$

$$V_{O_2SDH} = 0.5 \rho^{res(SDH)} \frac{\left( r_a + r_{c1} e^{\left(\frac{4F\Delta\Psi_B}{RT}\right)} \right) e^{\left(\frac{FA_{RSDH}}{RT}\right)} - r_a e^{\left(\frac{g4F\Delta\mu_H}{RT}\right)} + r_{c2} e^{\left(\frac{FA_{RSDH}}{RT}\right)} e^{\left(\frac{g4F\Delta\mu_H}{RT}\right)}}{\left(1 + r_1 e^{\left(\frac{FA_{RSDH}}{RT}\right)}\right) e^{\left(\frac{4F\Delta\Psi_B}{RT}\right)} + \left(r_2 + r_3 e^{\left(\frac{FA_{RSDH}}{RT}\right)}\right) e^{\left(\frac{g4F\Delta\mu_H}{RT}\right)}} \left( \frac{1}{1 + \frac{[OAA]}{K_i^{OAA}}} \right)$$

$$V_{HSDH} = 4 \rho^{res(SDH)} \frac{\left( r_a e^{\left(\frac{A_{RSDH}F}{RT}\right)} - (r_a + r_b) e^{\left(\frac{g4F\Delta\mu_H}{RT}\right)} \right)}{\left(1 + r_1 e^{\left(\frac{FA_{RSDH}}{RT}\right)}\right) e^{\left(\frac{4F\Delta\Psi_B}{RT}\right)} + \left(r_2 + r_3 e^{\left(\frac{FA_{RSDH}}{RT}\right)}\right) e^{\left(\frac{g4F\Delta\mu_H}{RT}\right)}} \left( \frac{1}{1 + \frac{[OAA]}{K_i^{OAA}}} \right)$$

$$A_{RSDH} = \frac{RT}{F} \ln \left( K_{RSDH,app} \sqrt{\frac{[SUC]}{[FUM]}} \right)$$

$$K_{RSDH,app} = \frac{K_{res(SDH)}}{P_{SUC}}$$

$$V_{ATPase} = -\rho^{F1} \frac{(100p_a + p_{c1} \exp(3F\Delta\Psi_B / RT)) \exp(A_{F1} F / RT) - \left( p_a \exp(3F\Delta\mu_H / RT) \right.}{(1 + p_1 \exp(A_{F1} F / RT)) \exp(3F\Delta\Psi_B / RT) + (p_2 + p_3 \exp(A_{F1} F / RT)) \exp(3F\Delta\mu_H / RT)} \left. \dots + p_{c2} \exp(A_{F1} F / RT) \exp(3F\Delta\mu_H / RT) \right)$$

$$V_{H^+} = -3\rho^{F1} \frac{100p_a (1 + \exp(A_{F1} F / RT)) - (p_a + p_b) \exp(3F\Delta\mu_H / RT)}{(1 + p_1 \exp(A_{F1} F / RT)) \exp(3F\Delta\Psi_B / RT) + (p_2 + p_3 \exp(A_{F1} F / RT)) \exp(3F\Delta\mu_H / RT)}$$

$$A_{F1} = \frac{RT}{F} \ln \left( K_{app}^{ATPase} \frac{[MgATP^{2-}]}{[ADP_{free}][Pi_{total}]} \right)$$

$$K_{app}^{ATPase} = K_{ref}^{ATPase} [H^+]^1 \frac{P_{ATP} P_{H_2O}}{P_{ADP} P_{Pi}}$$

### Acid-base equilibria of adenine nucleotides and phosphate

Chemical species in the biochemical reactions exist in mixed ionic forms such as protonated, deprotonated or binding to different cations(10-13). In general, the total concentration of ligand is the sum of free ligand, ligand bound to proton and to metals(13).

$$[L_{total}] = [L] + \sum_{p=1}^{N_p} [LH_p] + \sum_{m=1}^{N_m} [LM^m]$$

, where L is the ligand, H is the proton and M<sup>m</sup> is the m<sup>th</sup> metal ion.

Here, only the most abundant and physiological significant forms of ATP, ADP, and phosphate in the pH range from 5.0 to 9.0 were considered: ATP<sup>4-</sup>, HATP<sup>3-</sup>, MgATP<sup>-</sup>, ADP<sup>3-</sup>, HADP<sup>2-</sup>, MgADP<sup>-</sup>, HPO<sub>4</sub><sup>2-</sup>, and H<sub>2</sub>PO<sub>4</sub><sup>-</sup>.

---


$$[ATP^{4-}]_m = \frac{[ATP_{total}]_m}{\left(1 + \frac{[H^+]_m}{K_{a,ATP}} + \frac{[Mg^{2+}]_m}{K_{Mg,ATP}}\right)}$$

$$[HATP^{3-}]_m = \frac{[ATP^{4-}]_m [H^+]_m}{K_{a,ATP}}$$

$$[MgATP^{2-}]_m = \frac{[ATP^{4-}]_m [Mg^{2+}]_m}{K_{Mg,ATP}}$$

$$[ADP^{3-}]_m = \frac{[ADP_{total}]_m}{\left(1 + \frac{[H^+]_m}{K_{a,ADP}} + \frac{[Mg^{2+}]_m}{K_{Mg,ADP}}\right)}$$

$$[HADP^{2-}]_m = \frac{[ADP^{3-}]_m [H^+]_m}{K_{a,ADP}}$$

$$[MgADP^-]_m = \frac{[ADP^{3-}]_m [Mg^{2+}]_m}{K_{Mg,ADP}}$$

$$[H_2PO_4^-]_m = \frac{[Pi]_{total}}{1 + \frac{[H^+]_m}{K_{a,Pi}}}$$

$$[HPO_4^{2-}]_m = \frac{[H_2PO_4^-]_m K_{a,Pi}}{[H^+]_m}$$


---

$$[ATP^{4-}]_i = \frac{[ATP_{total}]_i}{\left(1 + \frac{[H^+]_i}{K_{a,ATP}} + \frac{[Mg^{2+}]_i}{K_{Mg,ATP}}\right)}$$

$$[ADP^{3-}]_i = \frac{[ADP_{total}]_i}{\left(1 + \frac{[H^+]_i}{K_{a,ADP}} + \frac{[Mg^{2+}]_i}{K_{Mg,ADP}}\right)}$$

$$[ATP_{total}] = [ATP^{4-}] + [HATP^{3-}] + [MgATP^-]$$

$$[ATP_{free}] = [ATP^{4-}] + [HATP^{3-}]$$

$$[ADP_{free}] = [ADP^{3-}] + [HADP^{2-}]$$

$$[Pi_{total}] = [H_2Pi^-] + [HPi^{2-}]$$


---

**Polynomials for species undergoing acid-base equilibrium, ionic gradients, and conservation relations**

$$P_{ATP} = 1 + \frac{[H^+]_m}{K_{a,ATP}} + \frac{[Mg^{2+}]_m}{K_{Mg,ATP}}$$

$$P_{ADP} = 1 + \frac{[H^+]_m}{K_{a,ADP}} + \frac{[Mg^{2+}]_m}{K_{Mg,ADP}}$$

$$P_{Pi} = 1 + \frac{[H^+]_m}{K_{a,Pi}}$$

$$P_{SUC} = 1 + \frac{[H^+]_m}{K_{a,SUC}}$$

$$P_{H_2O} = 1 + \frac{[H^+]_m}{K_{a,H_2O}}$$

$$\Delta\mu_H = -2.303 \frac{RT}{F} \Delta pH + \Delta\Psi_m$$

$$\Delta pH = pH_i - pH_m$$

$$\Delta\Psi_m = \Psi_i - \Psi_m$$

$$[NAD^+] = C_{PN} - [NADH]$$

$$[ATP_{total}] = C_A - [ADP_{total}]$$

**Adenine Nucleotide translocator (ANT)**

The rate expression of the ANT has been modified to better represent the dependence of the rate with respect to the cytoplasmic ADP concentration, as follows:

$$V_{ANT} = V_{\max ANT} \frac{\left(1 - \frac{[ATP^{4-}]_i \times [ADP^{3-}]_m}{[ADP^{3-}]_i \times [ATP^{4-}]_m}\right) \exp(-F\Delta\Psi_m / RT)}{\left(1 + \frac{[ATP^{4-}]_i}{[ADP^{3-}]_i} \exp(-hF\Delta\Psi / RT)\right) \left(1 + \frac{[ADP^{3-}]_m}{[ATP^{4-}]_m}\right)}$$

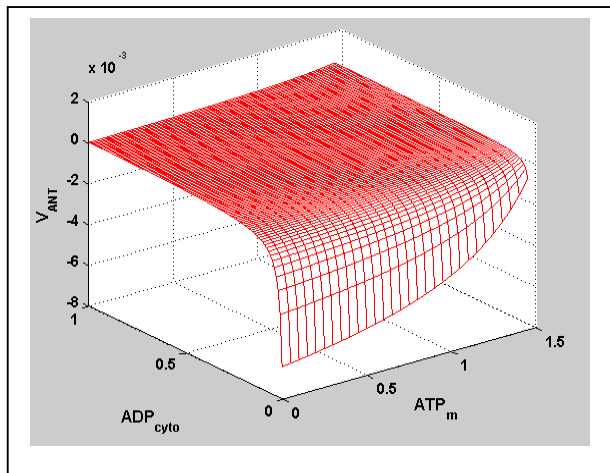

Figure S3. Dependence of ANT rate upon the concentration of cytoplasmic ADP,  $ADP_{cyto}$ , and mitochondrial ATP,  $ATP_m$ . Both variables are subjected to conservation relations being 1.0 for ADP+ATP in the cytoplasm, and 1.5 for ADP+ATP in the mitochondrial matrix. The expression is consistent with a reversion of the rate of ATP

transport at low  $ADP_{cyto}$  and  $ATP_m$ .

## Ionic fluxes rate equations

$$V_{uni} = V_{\max}^{uni} \frac{\frac{[Ca^{2+}]_i}{K_{trans}} \left(1 + \frac{[Ca^{2+}]_i}{K_{trans}}\right)^3 \frac{2F(\Delta\Psi_m - \Delta\Psi^\circ)}{RT}}{\left( \left(1 + \frac{[Ca^{2+}]_i}{K_{trans}}\right)^4 + \frac{L}{\left(1 + \frac{[Ca^{2+}]_i}{K_{act}}\right)^{n_a}} \right) \left(1 - e^{\left(\frac{-2F(\Delta\Psi_m - \Delta\Psi^\circ)}{RT}\right)}\right)}$$

$$V_{NaCa} = V_{\max}^{NaCa} \frac{e^{\left(\frac{bF(\Delta\Psi_m - \Delta\Psi^\circ)}{RT}\right)} e^{\left(\ln \frac{[Ca^{2+}]_m}{[Ca^{2+}]_i}\right)}}{\left(1 + \frac{K_{Na}}{[Na^+]_i}\right)^n \left(1 + \frac{K_{Na}}{[Ca^{2+}]_m}\right)}$$

$$J_{NHE} = c_{NHE} \frac{\beta_1^+ \beta_2^+ - \beta_1^- \beta_2^-}{\beta_1^+ + \beta_1^- + \beta_2^+ + \beta_2^-} \frac{1}{1 + 10^{n_i(pH_i - pK_i)}}$$

$$\beta_1^+ = \frac{k_1^+ K_{H\_NHE} [Na^+]_m}{K_{H\_NHE} [Na^+]_m + K_{H\_NHE} K_{Na\_NHE} + K_{Na\_NHE} [H^+]_m}$$

$$\beta_2^+ = \frac{k_2^+ K_{Na\_NHE} [H^+]_i}{K_{H\_NHE} [Na^+]_i + K_{H\_NHE} K_{Na\_NHE} + K_{Na\_NHE} [H^+]_i}$$

$$\beta_1^- = \frac{k_1^- K_{H\_NHE} [Na^+]_i}{K_{H\_NHE} [Na^+]_i + K_{H\_NHE} K_{Na\_NHE} + K_{Na\_NHE} [H^+]_i}$$

$$\beta_2^- = \frac{k_2^- K_{Na\_NHE} [H^+]_m}{K_{H\_NHE} [Na^+]_m + K_{H\_NHE} K_{Na\_NHE} + K_{Na\_NHE} [H^+]_m}$$

$$J_{PIC} = c_{PIC} \frac{V_{PIC,f} \frac{[HPO_4^{2-}]_i [OH^-]_m}{K_{Pi,i} K_{OH,m}} - V_{PIC,b} \frac{[HPO_4^{2-}]_m [OH^-]_i}{K_{Pi,m} K_{OH,i}}}{\left(1 + \frac{[HPO_4^{2-}]_i}{K_{Pi,i}} + \frac{[OH^-]_m}{K_{OH,m}} + \frac{[HPO_4^{2-}]_m}{K_{Pi,m}} + \frac{[OH^-]_i}{K_{OH,i}} + \frac{[HPO_4^{2-}]_m [OH^-]_i}{K_{Pi,m} K_{OH,i}} + \frac{[HPO_4^{2-}]_i [OH^-]_m}{K_{Pi,i} K_{OH,m}}\right)}$$

$$V_{Hleak} = g_H \Delta\mu_H$$

$$J_H = -V_{HNe} - V_{HSDH} + V_{hu} + V_{NHE} + V_{PIC} + V_{Hleak}$$

$$\sum_{k=1}^{N_i} n_k J_k = -(V_{IDH} + V_{KGDH} + V_{MDH} - V_{ATPase})$$

$$\sum \bar{N}_H^i \frac{d[L_i]}{dt} = \frac{[H^+]_m}{K_{a,ATP} P_{ATP}} \frac{d[ATP]_m}{dt} + \frac{[H^+]_m}{K_{a,ADP} P_{ADP}} \frac{d[ADP]_m}{dt} + \frac{[H^+]_m}{K_{a,Pi} P_{Pi}} \frac{d[Pi]_m}{dt} + \frac{[H^+]_m}{K_{a,SUC} P_{SUC}} \frac{d[SUC]_m}{dt}$$

$$\frac{d[H^+]_m}{dt} = \delta_H \left( -\sum_i \bar{N}_H^{L_i} \frac{d[L_i]}{dt} - \sum_{k=1}^{N_r} n_k J_k + J_H \right)$$

**Section 5. Parameter values used in the simulations:  
Tricarboxylic acid cycle**

| Symbol           | Value                                 | Units            | Description                               |
|------------------|---------------------------------------|------------------|-------------------------------------------|
| [AcCoA]          | $1 \cdot 10^{-4}$ - $1 \cdot 10^{-2}$ | mM               | Acetyl CoA concentration                  |
| $k_{cat}^{CS}$   | $7.841 \cdot 10^{-6}$                 | $ms^{-1}$        | Catalytic constant of CS                  |
| $E_T^{CS}$       | 0.4                                   | mM               | Concentration of CS                       |
| $K_M^{AcCoA}$    | 0.0126                                | mM               | Michaelis constant for AcCoA              |
| $K_M^{OAA}$      | $6.4 \cdot 10^{-4}$                   | mM               | Michaelis constant for OAA                |
| $C_{kint}$       | 1.3                                   | mM               | Sum of TCA cycle intermediates            |
| $k_f^{ACO}$      | $3.896 \cdot 10^{-6}$                 | $ms^{-1}$        | Forward rate constant of ACO              |
| $K_E^{ACO}$      | 2.22                                  |                  | Equilibrium constant of ACO               |
| $K_{i,NADH}$     | 0.19                                  | mM               | Inhibition constant by NADH               |
| $k_{cat}^{IDH}$  | 0.0264                                | $ms^{-1}$        | Rate constant of IDH                      |
| $E_T^{IDH}$      | 0.109                                 | mM               | Concentration of IDH                      |
| $k_{h,1}$        | $1 \cdot 10^{-5}$                     | mM               | Inoization constant of IDH                |
| $k_{h,2}$        | $9 \cdot 10^{-4}$                     | mM               | Inoization constant of IDH                |
| $K_M^{ISOC}$     | 1.52                                  | mM               | Michaelis constant for isocitrate         |
| $n_i$            | 2.0                                   |                  | Cooperativity for isocitrate              |
| $K_M^{NAD}$      | 0.923                                 | mM               | Michaelis constant for $NAD^+$            |
| $K_{ADP}^a$      | 0.62                                  | mM               | Activation constant by ADP                |
| $K_{Ca}^a$       | $5 \cdot 10^{-4}$                     | mM               | IDH activation constant for $Ca^{2+}$     |
| $E_T^{KGDH}$     | 0.5                                   | mM               | Concentration of KGDH                     |
| $k_{cat}^{KGDH}$ | 0.000883                              | $ms^{-1}$        | Rate constant of KGDH                     |
| $k_{cat}^{KGDH}$ | 30                                    | mM               | Michaelis constant for KGDH               |
| $k_{h,1a}$       | $4 \cdot 10^{-5}$                     | mM               | Ionization constant of KGDH               |
| $k_{h,2a}$       | $7 \cdot 10^{-5}$                     | mM               | Ionization constant of KGDH               |
| $K_D^{Mg^{2+}}$  | 0.0308                                | mM               | Activation constant for $Mg^{2+}$         |
| $K_D^{Ca^{2+}}$  | $1.5 \cdot 10^{-4}$                   | mM               | Activation constant for $Ca^{2+}$         |
| $K_M^{NAD}$      | 38.7                                  | mM               | Michaelis constant for NAD                |
| $n_{\alpha KG}$  | 1.2                                   |                  | Hill coefficient of KGDH for $\alpha KG$  |
| $[Mg^{2+}]_m$    | 0.4                                   | mM               | $Mg^{2+}$ concentration in mitochondria   |
| $[Mg^{2+}]_i$    | 1.0                                   | mM               | $Mg^{2+}$ concentration in cytosol/buffer |
| $k_f^{SL}$       | 0.0014                                | $mM^{-1}ms^{-1}$ | Forward rate constant of SL               |
| $K_E^{SL}$       | 3.115                                 |                  | Equilibrium constant of the SL reaction   |
| [CoA]            | 0.02                                  | mM               | Coenzyme A concentrations.                |
| $k_f^{FH}$       | 0.000415                              | $ms^{-1}$        | Forward rate constant for FH.             |
| $K_E^{FH}$       | 1.0                                   |                  | Equilibrium constant of FH                |
| $k_{h1}$         | $1.131 \cdot 10^{-5}$                 | mM               | Ionization constant of MDH                |
| $k_{h2}$         | 26.7                                  | mM               | Ionization constant of MDH                |
| $k_{h3}$         | $6.68 \cdot 10^{-9}$                  | mM               | Ionization constant of MDH                |
| $k_{h4}$         | $5.62 \cdot 10^{-6}$                  | mM               | Ionization constant of MDH                |
| $k_{offset}$     | $3.99 \cdot 10^{-2}$                  |                  | Offset of MDH pH activation factor        |

|                 |                     |           |                                        |
|-----------------|---------------------|-----------|----------------------------------------|
| $k_{cat}^{MDH}$ | 0.00621             | $ms^{-1}$ | Rate constant of MDH                   |
| $E_T^{MDH}$     | 0.154               | mM        | Total MDH enzyme concentration         |
| $K_M^{MAL}$     | 1.493               | mM        | Michaelis constant for malate          |
| $K_i^{OAA}$     | 0.031               | mM        | Inhibition constant for oxalacetate    |
| $K_M^{NAD}$     | 0.2244              | mM        | Michaelis constant for $NAD^+$         |
| [GLU]           | $1.10^{-4} \sim 20$ | mM        | Glutamate concentration.               |
| $k_f^{AAT}$     | 0.00107             | $ms^{-1}$ | Forward rate constant of AAT           |
| $K_E^{AAT}$     | 6.6                 |           | Equilibrium constant of AAT            |
| $k_{ASP}$       | $1.510^{-6}$        | $ms^{-1}$ | Rate constant of aspartate consumption |

## Oxidative phosphorylation

| Symbol            | Value                  | Units          | Description                                                          |
|-------------------|------------------------|----------------|----------------------------------------------------------------------|
| $r_a$             | $6.394 \cdot 10^{-13}$ | $ms^{-1}$      | Sum of products of rate constants                                    |
| $r_b$             | $1.762 \cdot 10^{-16}$ | $ms^{-1}$      | Sum of products of rate constants                                    |
| $r_{c1}$          | $2.656 \cdot 10^{-22}$ | $ms^{-1}$      | Sum of products of rate constants                                    |
| $r_{c2}$          | $8.632 \cdot 10^{-30}$ | $ms^{-1}$      | Sum of products of rate constants                                    |
| $r_1$             | $2.077 \cdot 10^{-18}$ |                | Sum of products of rate constants                                    |
| $r_2$             | $1.728 \cdot 10^{-9}$  |                | Sum of products of rate constants                                    |
| $r_3$             | $1.059 \cdot 10^{-26}$ |                | Sum of products of rate constants                                    |
| $\rho^{res}$      | $9.0 \cdot 10^{-5}$    | mM             | Concentration of electron carriers (respiratory complexes I-III-IV)  |
| $K_{res}$         | 0.02779                |                | Equilibrium constant of respiration                                  |
| $\rho^{res(SDH)}$ | $1.35 \cdot 10^{18}$   | mM             | Concentration of electron carriers (respiratory complexes II-III-IV) |
| $\Delta\Psi_B$    | 50                     | mV             | Phase boundary potential                                             |
| g                 | 0.85                   |                | Correction factor for voltage                                        |
| $K_{res(SDH)}$    | $5.765 \cdot 10^{13}$  |                | Equilibrium constant of SDH                                          |
| $p_a$             | $1.656 \cdot 10^{-8}$  | $ms^{-1}$      | Sum of products of rate constants                                    |
| $p_b$             | $3.373 \cdot 10^{-10}$ | $ms^{-1}$      | Sum of products of rate constants                                    |
| $p_{c1}$          | $9.651 \cdot 10^{-17}$ | $ms^{-1}$      | Sum of products of rate constants                                    |
| $p_{c2}$          | $4.585 \cdot 10^{-17}$ | $ms^{-1}$      | Sum of products of rate constants                                    |
| $p_1$             | $1.346 \cdot 10^{-4}$  |                | Sum of products of rate constants                                    |
| $p_2$             | $7.739 \cdot 10^{-7}$  |                | Sum of products of rate constants                                    |
| $p_3$             | $6.65 \cdot 10^{-15}$  |                | Sum of products of rate constants                                    |
| $\rho^{F1}$       | 0.1076                 | mM             | Concentration of $F_1F_0$ -ATPase                                    |
| $K_{F1}$          | $1.71 \cdot 10^6$      |                | Equilibrium constant of ATP synthesis                                |
| [Pi] <sub>i</sub> | 1.75-3.0               | mM             | Inorganic phosphate concentration                                    |
| $C_A$             | 1.5                    | mM             | Total sum of adenine nucleotides                                     |
| $V_{maxANT}$      | 0.4354                 | $mM \ ms^{-1}$ | Maximal rate of the ANT                                              |
| $h^{ANT}$         | 0.5                    |                | Fraction of $\Delta\Psi_B$                                           |
| $g_H$             | $3.0 \cdot 10^{-8}$    | $mM \ ms^{-1}$ | Ionic conductance of the inner membrane                              |
|                   | $5 \cdot 10^{-5}$      | $mV^{-1}$      |                                                                      |
| $C_{PN}$          | 1.0                    | mM             | Total sum of pyridine nucleotides                                    |
| $C_{mito}$        | $1.812 \cdot 10^{-3}$  | $mM \ mV^{-1}$ | Inner membrane capacitance                                           |



### Mitochondrial Ca<sup>2+</sup> handling

| Symbol            | Value                | Units               | Description                                                              |
|-------------------|----------------------|---------------------|--------------------------------------------------------------------------|
| $V_{\max}^{uni}$  | 0.002459             | mM ms <sup>-1</sup> | $V_{\max}$ uniporter Ca <sup>2+</sup> transport                          |
| $\Delta\Psi^o$    | 91                   | mV                  | Offset membrane potential                                                |
| $K_{act}$         | $3.8 \cdot 10^{-4}$  | mM                  | Activation constant                                                      |
| $K_{trans}$       | 0.019                | mM                  | $K_d$ for translocated Ca <sup>2+</sup>                                  |
| $L$               | 110.0                |                     | $K_{eq}$ for conformational transitions in uniporter                     |
| $n_a$             | 2.8                  |                     | Uniporter activation cooperativity                                       |
| $V_{\max}^{NaCa}$ | $9.33 \cdot 10^{-5}$ | mM ms <sup>-1</sup> | $V_{\max}$ of Na <sup>+</sup> /Ca <sup>2+</sup> exchanger                |
| $b$               | 0.5                  |                     | $\Delta\Psi_m$ dependence on Na <sup>+</sup> /Ca <sup>2+</sup> exchanger |
| $K_{Na}$          | 9.4                  | mM                  | Exchanger Na <sup>2+</sup> constant                                      |
| $K_{Ca}$          | $3.75 \cdot 10^{-4}$ | mM                  | Exchanger Ca <sup>2+</sup> constant                                      |
| $n$               | 3.0                  |                     | Na <sup>+</sup> /Ca <sup>2+</sup> exchanger cooperativity                |
| $\delta_{Ca}$     | $3.0 \cdot 10^{-4}$  |                     | Fraction of free [Ca <sup>2+</sup> ] <sub>m</sub>                        |

### Mitochondrial H<sup>+</sup> and Na<sup>+</sup> handling

| Symbol        | Value        | Units         | Description                                      |
|---------------|--------------|---------------|--------------------------------------------------|
| $\delta_H$    | $1.10^{-5*}$ | dimensionless | mitochondria H <sup>+</sup> buffering capacity   |
| $pK_{a,ADP}$  | 6.38         |               | pKa of ADP dissociation constant                 |
| $pK_{a,ATP}$  | 6.48         |               | pKa of ATP dissociation constant                 |
| $pK_{a,Pi}$   | 6.75         |               | pKa of Pi dissociation constant                  |
| $pK_{Mg,ATP}$ | 4.19         |               | pK of Mg <sup>2+</sup> ATP dissociation constant |
| $pK_{Mg,ADP}$ | 3.25         |               | pK of Mg <sup>2+</sup> ADP dissociation constant |
| $pK_{a,SUC}$  | 5.2          | dimensionless | pKa of succinate dissociation constant           |
| $K_{a,H_2O}$  | $1.10^{-14}$ | M             | dissociation constant for water                  |
| $[H^+]_i$     | $1.10^{-4}$  | mM            | cytosolic H <sup>+</sup> concentration           |
| $[Na^+]_i$    | 5.0          | mM            | cytosolic Na <sup>+</sup> concentration          |
| $[Ca^{2+}]_i$ | $110^{-4}$   | mM            | cytosolic Ca <sup>2+</sup> concentration         |
| $[ADP]_i$     | 0.01~1.0     | mM            | cytosolic ADP concentration                      |

\*fromNgyuen(6) and Vaughan-Jones (8)

## Section 6. State variables initial conditions

| Symbol                           | Value                 | Units | Description                      |
|----------------------------------|-----------------------|-------|----------------------------------|
| [ADP] <sub>m</sub>               | 0.00406               | mM    | Mitochondrial ADP                |
| [NADH]                           | $1.41 \cdot 10^{-10}$ | mM    | Mitochondrial NADH               |
| $\Delta\Psi_m$                   | 154.95                | mV    | mitochondrial membrane potential |
| [ISOC]                           | 0.00984               | mM    | Isocitrate                       |
| [ $\alpha$ KG]                   | 0.00354               | mM    | $\alpha$ -ketoglutarate          |
| [SCoA]                           | 0.01582               | mM    | Succinyl CoA                     |
| [Suc]                            | 0.00179               | mM    | Succinate                        |
| [FUM]                            | 0.11024               | mM    | Fumarate                         |
| [MAL]                            | 0.10969               | mM    | Malate                           |
| [OAA]                            | 1.03599               | mM    | Oxalacetate                      |
| [H <sup>+</sup> ] <sub>m</sub>   | $9.19 \cdot 10^{-5}$  | mM    | Mitochondrial H <sup>+</sup>     |
| [Na <sup>+</sup> ] <sub>m</sub>  | 5.85096               | mM    | Mitochondrial Na <sup>+</sup>    |
| [Pi] <sub>m</sub>                | 6.47248               | mM    | Mitochondrial Pi                 |
| [Ca <sup>2+</sup> ] <sub>m</sub> | $5.56 \cdot 10^{-5}$  | mM    | Mitochondrial Ca <sup>2+</sup>   |

## Section 7. Glossary

| Symbol                                | Definition                                                                          |
|---------------------------------------|-------------------------------------------------------------------------------------|
| $\bar{N}_H^i$                         | Average proton binding of $i^{\text{th}}$ metabolite                                |
| $n_k$                                 | Proton stoichiometry of the $k^{\text{th}}$ reference reaction                      |
| $\nu_j^k$                             | Stoichiometric coefficient of species $j$ in the $k^{\text{th}}$ reference reaction |
| $J_k$                                 | Flux of $k^{\text{th}}$ reaction                                                    |
| $J_H$                                 | Transport flux of proton                                                            |
| $N_r$                                 | Number of chemical reactions                                                        |
| $K_{ref}^k$                           | Equilibrium constant of $k^{\text{th}}$ reference reaction                          |
| $K_{app}^k$                           | Apparent equilibrium constant of $k^{\text{th}}$ reaction                           |
| $\delta_H$                            | Proton buffer capacity                                                              |
| $\delta_{Ca}$                         | Calcium buffer capacity                                                             |
| $\alpha$ KG                           | $\alpha$ -ketoglutarate                                                             |
| ASP                                   | Aspartate                                                                           |
| CIT                                   | Citric acid                                                                         |
| F <sub>1</sub> F <sub>0</sub> -ATPase | Mitochondrial F <sub>1</sub> F <sub>0</sub> ATP synthase                            |
| FUM                                   | Fumarate                                                                            |
| IDH                                   | Isocitrate dehydrogenase                                                            |
| ISOC                                  | Isocitrate                                                                          |
| KGDH                                  | $\alpha$ -ketoglutarate dehydrogenase                                               |
| MAL                                   | Malate                                                                              |
| OAA                                   | Oxalacetate                                                                         |
| SCoA                                  | Succinyl CoA                                                                        |

|                   |                                                                 |
|-------------------|-----------------------------------------------------------------|
| Suc               | Succinate                                                       |
| TCA               | Tricarboxylic acid cycle                                        |
| $V_{AAT}$         | Rate of aspartate amino transferase                             |
| $V_{ACO}$         | Rate of aconitase                                               |
| $V_{ANT}$         | Rate of the adenine nucleotide transferase                      |
| $V_{ATPsynthase}$ | Rate of the $F_1F_0$ ATP synthase                               |
| $V_{CS}$          | Rate of the citrate synthase                                    |
| $V_{FH}$          | Rate of the fumaratehydratase                                   |
| $V_{He}$          | Rate of proton transport driven by complex I, III, and IV       |
| $V_{HSDH}$        | Rate of proton transport driven by complex II, III and IV       |
| $V_{Hleak}$       | Rate of proton leak across the inner mitochondrial membrane     |
| $V_{Hu}$          | Rate of proton uptake via $F_1F_0$ ATP synthase                 |
| $V_{IDH}$         | Rate of isocitrate dehydrogenase                                |
| $V_{KGDH}$        | Rate of alph-ketoglutarate dehydrogenase                        |
| $V_{MDH}$         | Rate of malate dehydrogenase                                    |
| $V_{NaCa}$        | Rate of the mitochondrial $Na^+/Ca^{2+}$ exchanger              |
| $V_{NHE}$         | Rate of the mitochondrial $Na^+/H^+$ exchanger                  |
| $V_{O_2}$         | Oxygen consumption rate driven by complex I                     |
| $V_{O_2SDH}$      | Oxygen consumption rate driven by complex II                    |
| $V_{PiC}$         | Rate of the mitochondrial phosphate carrier                     |
| $V_{SDH}$         | Rate of succinate dehydrogenase (complex II)                    |
| $V_{SL}$          | Rate of succinate lyase                                         |
| $V_{uni}$         | Rate of $Ca^{2+}$ uniporter in the mitochondrial inner membrane |
| G/M               | Glutamate and malate                                            |
| DNP               | Dinitrophenol                                                   |
| CN                | Cyanide                                                         |
| $\Delta\psi_m$    | Electrical potential across the mitochondrial inner membrane    |
| $\Delta p$        | Proton motive force                                             |

## Section 8.pH regulation in the mitochondria

To account for pH regulation, our present mitochondria model includes direct proton activation to the TCA cycle enzymes IDH, MDH and KGDH, the acid transporters NHE and PiC, and the proton pumps as well as apparent equilibrium constants and multiple equilibrium with protons. The principles of proton consumption or release by biochemical reactions occurred in the mitochondria and pH effects on equilibrium constants in this model was build upon the work of Alberty(14, 15) and the extended work by Vinnakota et al.(13).

### Differential equation for $[H^+]_m$

The pH change of the mitochondria was accounted from the proton flux through a set of reactions including biochemical reactions in the mitochondria, and also proton transport across the membrane.

$$\frac{d[H^+]_m}{dt} = \delta_H \left( -\sum_i \bar{N}_H^{L_i} \frac{d[L_i]}{dt} - \sum_{k=1}^{N_r} n_k J_k + J_H \right),$$

where  $\delta_H$  is the proton buffer capacity of the mitochondrial matrix.

The first component is from the pH changes due the proton binding of the metabolite  $L_i$ . We considered just metabolites ADP, ATP, phosphate and succinate.  $\bar{N}_H^{L_i}$  is the average proton bound to metabolite  $L_i$ .

$$\bar{N}_H^{L_i} = \frac{\sum_{p=1}^{N_p} p[L H_p]}{[L_{total}]} = \frac{\sum_{p=1}^{N_p} p[LH_p]}{[L] + \sum_{p=1}^{N_p} p[LH_p] + \sum_{m=1}^{N_m} p[LM^m]}$$

The second component  $\sum_{k=1}^{N_r} n_k J_k$  accounts for pH change due to consumption flux

through reactions in which  $H^+$  participate.  $n_k$  is the stoichiometry for proton consumption of a reference reaction (see definition below)(13).  $J_k$  is the flux through  $k^{\text{th}}$  biochemical reaction and  $N_r$  is the total number of protons participating in the biochemical reaction. Proton consumption stoichiometry could be expressed as:

$$\Delta_r N_H = \sum_{\text{product}} \bar{N}_H^{\text{product}} - \sum_{\text{reactant}} \bar{N}_H^{\text{reactant}} + n$$

Here, we assumed the changes of average proton binding to metabolite are small within the physiological pH range, omitted the difference between the average proton binding of the reactants and the products, and only considered  $n$  proton consumed or generated in the reference reactions (Table S4)).

The third component,  $J_H$ , is the proton fluxes that contribute to the mitochondrial pH changes, including proton pumps, proton leak and proton transports through NHE and PiC.

**Table S4. Reference reactions**

Reference reaction is defined as the reaction in terms of the reference species of the metabolites as defined in (13). Reference species are defined as the most deprotonated form of the metabolites in the range of pH 5.0-9.0(13).

| Enzyme                                | Reference reactions                                                                | n  |
|---------------------------------------|------------------------------------------------------------------------------------|----|
| Citrate synthase                      | $AcCoA + OAA^{2-} + H_2O \rightleftharpoons CIT^{3-} + CoASH + H^+$                | -1 |
| Aconitase                             | $CIT^{3-} \rightleftharpoons ICIT^{3-}$                                            | 0  |
| Isocitrate dehydrogenase              | $ICIT^{3-} + NAD^+ + H_2O \rightleftharpoons AKG^{2-} + NADH + HCO_3^- + H^+$      | -1 |
| $\alpha$ -ketoglutarate dehydrogenase | $AKG^{2-} + CoASH + NAD^+ + H_2O \rightleftharpoons HCO_3^- + SCoA^- + NADH + H^+$ | -1 |
| Succinyl-CoA synthetase               | $SCoA^- + ADP^{3-} + HPO_4^{2-} \rightleftharpoons CoASH + SUC^{2-} + ATP^{4-}$    | 0  |
| Succinate dehydrogenase               | $SUC^{2-} + CoQ \rightleftharpoons QH_2 + FUM^{2-}$                                | 0  |
| Fumarase                              | $FUM^{2-} + H_2O \rightleftharpoons MAL^{2-}$                                      | 0  |
| Malate dehydrogenase                  | $NAD^+ + MAL^{2-} \rightleftharpoons OAA^{2-} + NADH + H^+$                        | -1 |
| ATP hydrolysis                        | $ATP^{4-} + H_2O \rightleftharpoons ADP^{3-} + HPI^{2-} + H^+$                     | -1 |
| ATP synthase                          | Reverse reaction of ATP hydrolysis                                                 | +1 |

**Apparent equilibrium constant as a function of pH**

Apparent equilibrium constant is defined in terms of the species concentration at equilibrium and a function of pH(13).

$$K' = [H^+]^n \frac{\prod P_{product}}{\prod P_{reactant}}$$

where  $n$  is proton stoichiometry of the reference reaction and  $P$  is the binding polynomial ( $P=1+\sum_{p=1}^{N_p} \frac{[H]^p}{\prod_{l=1}^p K_{a,l}} + \sum_{m=1}^{N_m} \frac{[M^m]}{K_{M^m}}$ ).  $K_{ref}$  is the equilibrium constant for the

reference reaction ( $K_{ref} = e^{-\Delta_r G^0/RT}$ ).

In the model, equilibrium constants of the reactions of FoF1-ATPase, succinate dehydrogenase(SDH) and succinyl CoA lyase(SL) are considered as function of pH. In other reactions, the pH effect on the apparent equilibrium constant is assumed to be small enough to be neglected.

### pH-dependence of TCA cycle enzyme activities

pH affects enzyme activities because the ionizable groups in the active sites of enzymes must be in the proper ionic form to maintain the catalytic function. The TCA cycle enzyme alpha-ketoglutarate dehydrogenase (KGDH), was modeled as a function of pH(16, 17) besides the other two enzymes isocitrate dehydrogenase (IDH), and malate dehydrogenase(MDH) in the TCA cycle. The mathematical expression of KGDH is described below with enzyme activities sensitive to pH (Fig.S4 A),  $Ca^{2+}$  (Fig.S4 B) and  $Mg^{2+}$ . The dissociation constants of protons and calcium were obtained by fitting to experimental data(18-20).

$$V_{KGDH} = \frac{k_{cat}^{KGDH} K_T^{KGDH}}{1 + \frac{[H^+]_m}{k_{h,1a}} + \frac{k_{h,2a}}{[H^+]_m} + f_a^{KGDH} \left( \frac{k_M^{aKG}}{[\alpha KG]} \right)^{n_{aKG}} + f_a^{KGDH} \frac{k_M^{NAD}}{[NAD]}}$$

$$f_a^{KGDH} = \left[ \left( 1 + \frac{[Mg^{2+}]}{K_D^{Mg^{2+}}} \right) \left( 1 + \frac{[Ca^{2+}]_m}{K_D^{Ca^{2+}}} \right) \right]^{-1}$$

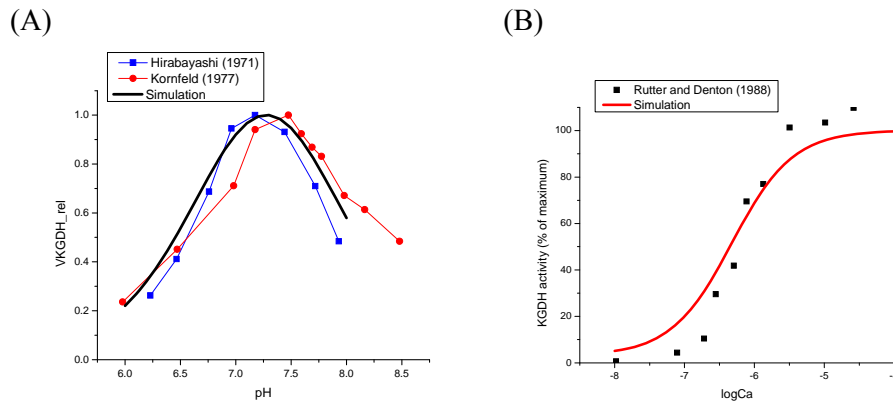

Figure S4. Model and experimental data of KGDH

(A) relative enzyme activity as a function of pH(18, 19) and (B) enzyme activity as a function of calcium(20).

## Section 9. Experimental flow force relations in oxidative phosphorylation.

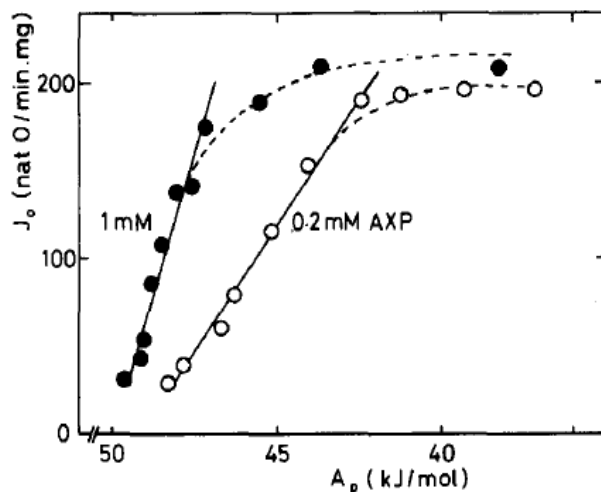

Figure S5. Relationship between mitochondrial oxygen uptake and affinity of phosphorylation with its dependence on the total adenine nucleotide concentration. Mitochondria were incubated with 20 mM succinate and hexokinase at different levels of sodium ATP: 0.2 mM (empty symbols) or 1.0 mM (filled symbols). Hexokinase will render various steady state levels of ATP/ADP and the large excess of succinate will ensure constant oxidation potential. Reproduced from van der Meer et al. (21).

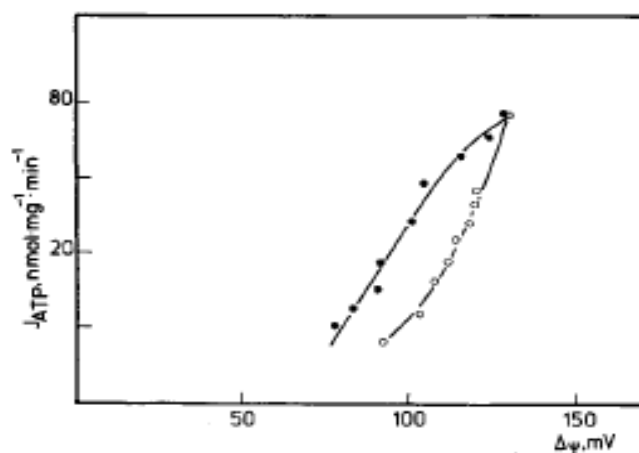

Figure S6. Relationship between succinate-driven  $J_{ATP}$  and membrane potential in titrations with FCCP and  $\text{ClO}_4^-$ . The measurements were carried out with mitochondrial particles in the presence of excess glucose and NADP, hexokinase and glucose 6 phosphate dehydrogenase. Filled symbols indicate titration with  $\text{ClO}_4^-$  whereas empty symbols depict titrations with FCCP. Reproduced from Petronilli et al. (22).

## References

1. Cortassa, S., et al., *An integrated model of cardiac mitochondrial energy metabolism and calcium dynamics*. Biophys J, 2003. **84**(4): p. 2734-55.
2. Cortassa, S., et al., *A computational model integrating electrophysiology, contraction, and mitochondrial bioenergetics in the ventricular myocyte*. Biophys J, 2006. **91**(4): p. 1564-89.
3. Crampin, E.J. and N.P. Smith, *A dynamic model of excitation-contraction coupling during acidosis in cardiac ventricular myocytes*. Biophys J, 2006. **90**(9): p. 3074-90.
4. Kapus, A., E. Ligeti, and A. Fonyo, *Na<sup>+</sup>/H<sup>+</sup> exchange in mitochondria as monitored by BCECF fluorescence*. FEBS Lett, 1989. **251**(1-2): p. 49-52.
5. Stappen, R. and R. Kramer, *Kinetic mechanism of phosphate/phosphate and phosphate/OH<sup>-</sup> antiports catalyzed by reconstituted phosphate carrier from beef heart mitochondria*. J BiolChem, 1994. **269**(15): p. 11240-6.
6. Nguyen, M.H., S.J. Dudycha, and M.S. Jafri, *Effect of Ca<sup>2+</sup> on cardiac mitochondrial energy production is modulated by Na<sup>+</sup> and H<sup>+</sup> dynamics*. Am J Physiol Cell Physiol, 2007. **292**(6): p. C2004-20.
7. Brierley, G.P., et al., *Kinetic properties of the Na<sup>+</sup>/H<sup>+</sup> antiport of heart mitochondria*. Biochemistry, 1989. **28**(10): p. 4347-54.
8. Vaughan-Jones, R.D., et al., *Intrinsic H<sup>(+)</sup> ion mobility in the rabbit ventricular myocyte*. J Physiol, 2002. **541**(Pt 1): p. 139-58.
9. Randle, P.J. and P.K. Tubbs, *Carbohydrate and fatty acid metabolism*, in *Handbook of Physiology*, R.M. Berne, N. Sperelakis, and R. Geiger, Editors. 1979, American Physiology Society. p. 805-844.
10. Alberty, R.A., *Thermodynamics of biochemical reactions*. 2003, Hoboken, N.J.: Wiley-Interscience. ix, 397 p.
11. Kushmerick, M.J., *Multiple equilibria of cations with metabolites in muscle bioenergetics*. Am J Physiol, 1997. **272**(5 Pt 1): p. C1739-47.
12. Alberty, R.A., *Biochemical Thermodynamics: Applications of Mathematica*. 2006.
13. Vinnakota, K., M.L. Kemp, and M.J. Kushmerick, *Dynamics of muscle glycogenolysis modeled with pH time course computation and pH-dependent reaction equilibria and enzyme kinetics*. Biophys J, 2006. **91**(4): p. 1264-87.
14. Alberty, R., *Thermodynamics of biochemical reactions*. 2003. ix, 397 p.
15. Alberty, R., *Biochemical Thermodynamics: Applications of Mathematica*. 2006.
16. Cornish-Bowden, A., *Fundamentals of enzyme kinetics*. 2004, Portland press.
17. Segel, I.H., *Enzyme kinetics: behavior and analysis of rapid equilibrium and steady state enzyme systems*. 1993: Wiley & Sons.
18. Hirabayashi, T. and T. Harada, *Isolation and properties of -ketoglutarate dehydrogenase complex from baker's yeast (*Saccharomyces cerevisiae*)*. BiochemBiophys Res Commun, 1971. **45**(6): p. 1369-75.



19. Kornfeld, S., M. Benziman, and Y. Milner, *Alpha-ketoglutarate dehydrogenase complex of Acetobacterxylinum. Purification and regulatory properties.* J BiolChem, 1977. **252**(9): p. 2940-7.
20. Rutter, G.A. and R.M. Denton, *Regulation of NAD<sup>+</sup>-linked isocitrate dehydrogenase and 2-oxoglutarate dehydrogenase by Ca<sup>2+</sup> ions within toluene-permeabilized rat heart mitochondria. Interactions with regulation by adenine nucleotides and NADH/NAD<sup>+</sup> ratios.*Biochem J, 1988. **252**(1): p. 181-9.
21. Van der Meer, R., H. Westeroff, and K. Van Dam, *Linear relation between rate and thermodynamic force in enzyme-catalyzed reactions.*BiochimBiophysActa, 1980.**591**(2): p. 488-493.
22. Petronilli, V., et al., *Flow-force relationships during energy transfer between mitochondrial proton pumps.*BiochimBiophysActa, 1991.**1058**(2): p. 297-303.
